# Supplementary material for: Stereotactic radiosurgery vs. fractionated radiotherapy for tumor control in vestibular schwannoma patients: a systematic review
Source: PubMed Central journal article supplement (PMC5425507; doi:10.1007/s00701-017-3164-6), 2017-04-13

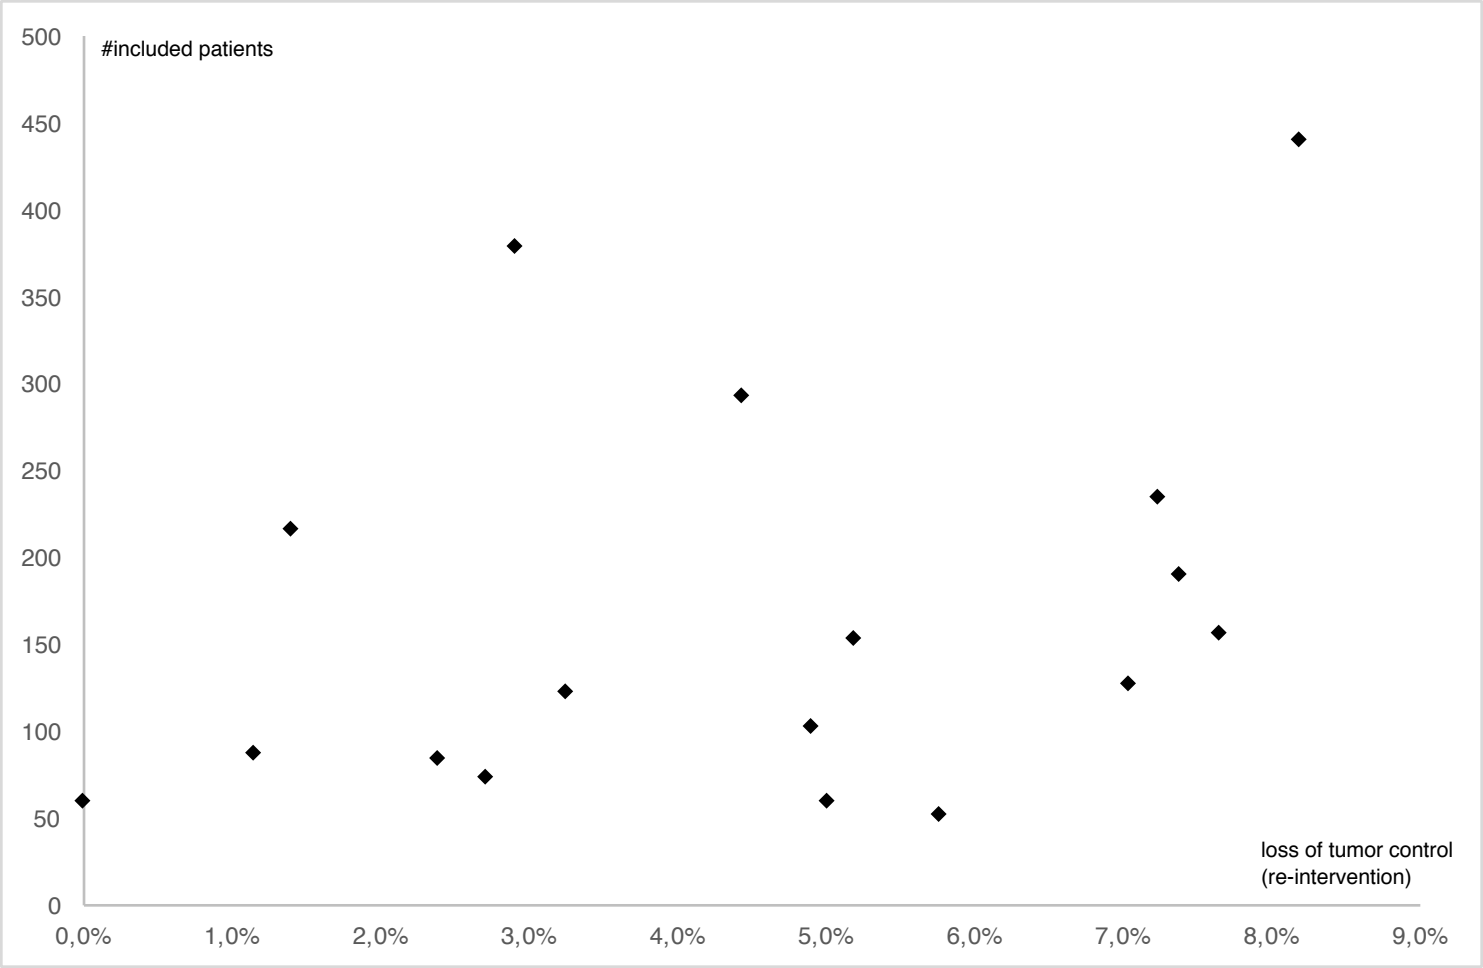

Supplement: 701_2017_3164_MOESM1_ESM.pdf [file 701_2017_3164_MOESM1_ESM.pdf]
