# Supplementary material for: Stereotactic radiosurgery vs. fractionated radiotherapy for tumor control in vestibular schwannoma patients: a systematic review
Source: Springer Nature journal article supplement (doi:10.1007/s00701-017-3164-6), 2017-04-13
Supplement: MOESM2 [file 12223042]

Web of Science 15-01-28

| Nr |                                                                                                            | Results |
|----|------------------------------------------------------------------------------------------------------------|---------|
| 1  | neuroma, acoustic OR vestibular schwannoma (topic)                                                         | 11923   |
| 2  | radiosurgery OR stereotactic radiosurgery OR fractionated radiosurgery OR gamma knife radiosurgery (topic) | 24929   |
| 3  | radiotherapy OR fractionated radiotherapy OR external beam radiotherapy OR radiation therapy (topic)       | 484461  |
| 4  | # 1 AND # 2 AND # 3                                                                                        | 771     |
| 5  | Publ datum 1995-2014, article, review, other, abstract, clinical trial, språk eng, fra, spa, ty            | 531     |

Cochrane 15-01-28

| Nr |                                                         | Results                  |
|----|---------------------------------------------------------|--------------------------|
| 1  | neuroma, acoustic OR vestibular schwannoma (ti, ab, kw) | 96                       |
| 2  | radiosurgery (ti, ab, kw)                               | 317                      |
| 3  | radiotherapy (ti, ab, kw)                               | 12499                    |
| 4  | # 1 AND # 2 AND # 3                                     | 4<br>DARE/1<br>CENTRAL/3 |

Embase 15-02-02

| Nr |                                                                      | Results |
|----|----------------------------------------------------------------------|---------|
| 1  | acoustic AND (neurinoma/exp OR neurinoma) (mtree)                    | 7328    |
| 2  | vestibular AND (schwannoma/exp OR schwannoma)                        | 2872    |
| 3  | # 1 OR # 2                                                           | 8451    |
| 4  | radiosurgery/exp OR radiosurgery (mtree)                             | 39036   |
| 5  | radiotherapy/exp OR radiotherapy (mtree)                             | 533776  |
| 6  | # 3 AND # 4 AND # 5                                                  | 875     |
| 7  | Publ datum 1995-2014, abstract tillgängligt, språk eng, fra, spa, ty | 676     |
