# Supplementary material for: Stereotactic radiosurgery vs. fractionated radiotherapy for tumor control in vestibular schwannoma patients: a systematic review
Source: Springer Nature journal article supplement (doi:10.1007/s00701-017-3164-6), 2017-04-13
Supplement: MOESM3 [file 12223042]

| Author (year)                   | Tumor volume (ml) | Max diameter (mm) | Margin dose (Gy) | Isodose (%)  | Max dose (Gy)    | Total dose (Gy) | Dose (Gy)/Fractionation |
|---------------------------------|-------------------|-------------------|------------------|--------------|------------------|-----------------|-------------------------|
| Unger <i>et al.</i> (2002)      | 3.8 (0.02-27.22)  |                   | 12 Gy (9-18Gy)   | 30-80%       |                  |                 |                         |
| Iwai <i>et al.</i> (2003)       | 3.6 (0.7-24.9)    |                   | 12 Gy (8-12)     |              |                  |                 |                         |
| Myrseth <i>et al.</i> (2005)    |                   |                   | 12.2 Gy (10-20)  |              | 35.3 Gy (17-40)  |                 |                         |
| Hempel <i>et al.</i> (2006)     | 1.6 (0.1-9.9)     |                   | 13 Gy (10-14.5)  | 40-85%       | 22.7 (15.6-32.5) |                 |                         |
| Liu <i>et al.</i> (2006)        | 10.8 (0.11-27.8)  |                   | 12.3 (10-14)     |              | 24.9 (21-30)     |                 |                         |
| Chopra <i>et al.</i> (2007)     | 1.3 (0.08-37.5)   |                   | 13 (12-13)       | 50-65        | 26 (20-26)       |                 |                         |
| Fukuoka <i>et al.</i> (2009)    | 2.0 (0.1-18.6)    |                   | 12.0 (9-15)      |              | 24 (17.1-30)     |                 |                         |
| Pollock <i>et al.</i> (2009)    | 2.9               |                   | 13 (12-14)       |              | 28 (24-30)       |                 |                         |
| Nagano <i>et al.</i> (2010)     | 2.5 (0.1-13.2)    |                   | 12.0 (10.5-13.0) | 50 (50-67)   |                  |                 |                         |
| Roos <i>et al.</i> (2011)       |                   | 22 (11-40)        | 12 (12-14)       |              |                  |                 |                         |
| Sun <i>et al.</i> (2012)        | 3.6 (0.3-27.3)    |                   | 13.0 (6.0-14.4)  | 45 (20-68)   | 28.0 (15.0-60.0) |                 |                         |
| Yomo <i>et al.</i> (2012)       | 0.73 (0.03-5.37)  |                   | 12.1 (9-14)      | 51.1 (40-80) |                  |                 |                         |
| Hasegawa <i>et al.</i> (2013)   | 2.8 (0.07-36.7)   |                   | 12.8 (10-18)     | 50 (40-95)   | 25 (13-36)       |                 |                         |
| Kim <i>et al.</i> (2013)        | 0.34 (0.03-1.00)  |                   | 12.2 (11.5-13.0) | 51 (50-70)   | 24.3 (17.1-26.2) |                 |                         |
| Boari <i>et al.</i> (2014)      | 1.2 (0.013-14.3)  |                   | 13 (11-15)       | 50 (40-63)   | 26 (20-32.6)     |                 |                         |
| Mindermann <i>et al.</i> (2014) | 1.85              |                   | 12.9             | 50           | 25.8             |                 |                         |
| Wangerid <i>et al.</i> (2014)   | 1.65 (0.1-8.4)    |                   | 12.3 (11-16)     | 50-60        | 26 (17-47)       |                 |                         |
| Aoyama <i>et al.</i> (2012)     |                   | 20 (7-48)         |                  | 80-90        |                  | 50 (30-50)      | 2 (1.8-2)*              |
| Litre <i>et al.</i> (2013)      | 2.7 (1.5-15.5)    |                   |                  |              |                  | 50              | 1.8                     |

Dose schedules of the studies included in the analysis. Values are reported as median or mean (range).

\* 7 of 201 patients in *Aoyama et al.* recieved a hypofractionated treatment regime.
