# Supplementary material for: Stereotactic radiosurgery vs. fractionated radiotherapy for tumor control in vestibular schwannoma patients: a systematic review
Source: Springer Nature journal article supplement (doi:10.1007/s00701-017-3164-6), 2017-04-13
Supplement: MOESM4 [file 12223042]

| Artikel                         | Loss of tumor control<br>(as defined by author) |             |
|---------------------------------|-------------------------------------------------|-------------|
|                                 | SRS                                             | FSRT        |
| Unger <i>et al.</i> (2002)      | 4/60                                            |             |
| Iwai <i>et al.</i> (2003)       | 3/52                                            |             |
| Myrseth <i>et al.</i> (2005)    | 11/102                                          |             |
| Hempel <i>et al.</i> (2006)     | 5/123                                           |             |
| Liu <i>et al.</i> (2006)        | 3/74                                            |             |
| Chopra <i>et al.</i> (2007)     | 7/216                                           |             |
| Fukuoka <i>et al.</i> (2009)    | 12/157                                          |             |
| Pollock <i>et al.</i> (2009)    | 15/293                                          |             |
| Nagano <i>et al.</i> (2010)     | 7/87                                            |             |
| Roos <i>et al.</i> (2011)       | 2/84                                            |             |
| Sun <i>et al.</i> (2012)        | 20/190                                          |             |
| Yomo <i>et al.</i> (2012)       | 8/154                                           |             |
| Hasegawa <i>et al.</i> (2013)   | 31/440                                          |             |
| Kim <i>et al.</i> (2013)        | 0/60                                            |             |
| Boari <i>et al.</i> (2014)      | 11/379                                          |             |
| Mindermann <i>et al.</i> (2014) | 21/235                                          |             |
| Wangerid <i>et al.</i> (2014)   | 10/128                                          |             |
| Aoyama <i>et al.</i> (2012)     |                                                 | 13/201      |
| Litre <i>et al.</i> (2013)      |                                                 | 4/155       |
| <b>Total</b>                    | <b>6.2%</b>                                     | <b>4.8%</b> |
